# Supplementary material for: Single-cell profiling identifies ACE+ granuloma macrophages as a nonpermissive niche for intracellular bacteria during persistent Salmonella infection
Source: PubMed Central journal article supplement (PMC9821941; doi:10.1126/sciadv.add4333), 2023-01-06
Supplement: sciadv.add4333_sm.pdf [file sciadv.add4333_sm.pdf]

Supplementary Materials for  
**Single-cell profiling identifies ACE<sup>+</sup> granuloma macrophages as a  
nonpermissive niche for intracellular bacteria during  
persistent Salmonella infection**

Trung H. M. Pham *et al.*

Corresponding author: Denise M. Monack, [dmonack@stanford.edu](mailto:dmonack@stanford.edu); Trung H. M. Pham,  
[tpham8@stanford.edu](mailto:tpham8@stanford.edu); Stephen R. Quake, [steve@quake-lab.org](mailto:steve@quake-lab.org)

*Sci. Adv.* **9**, eadd4333 (2023)  
DOI: 10.1126/sciadv.add4333

**This PDF file includes:**

Figs. S1 to S6  
Table S1

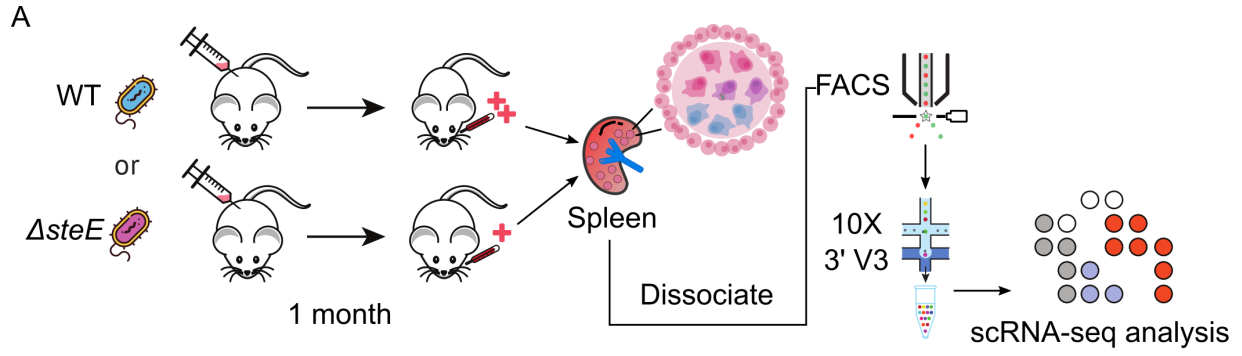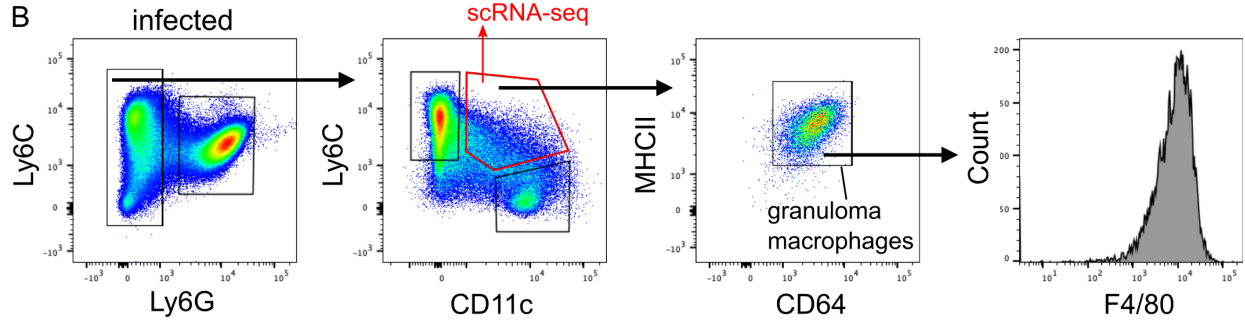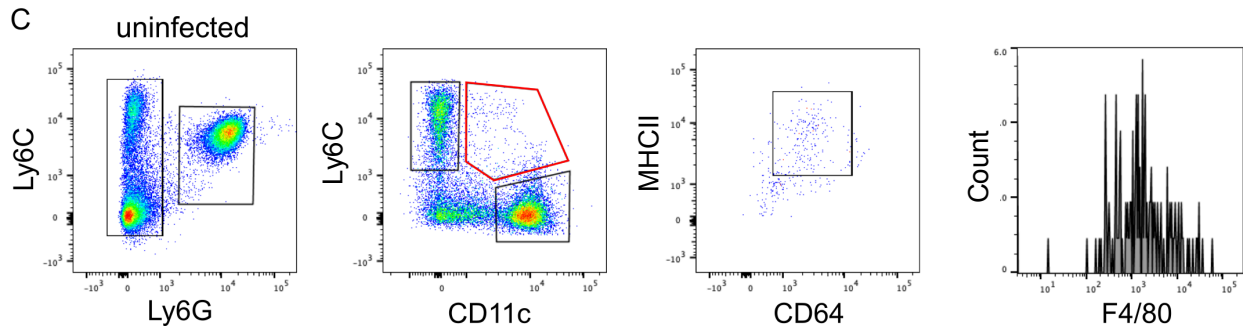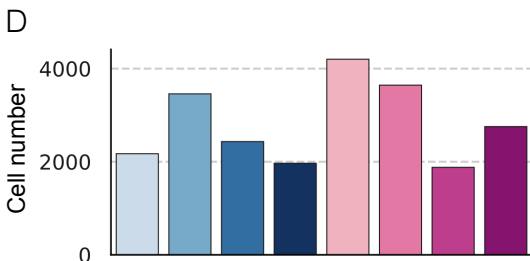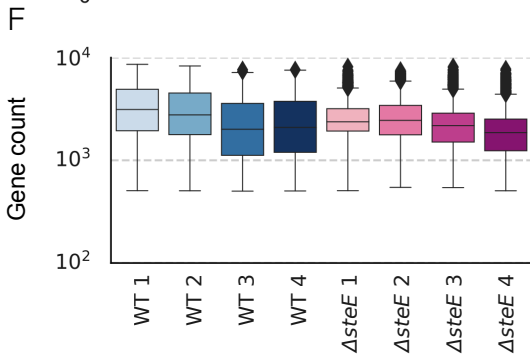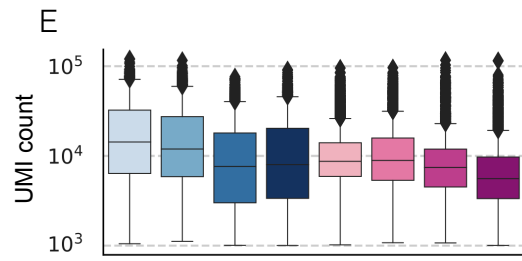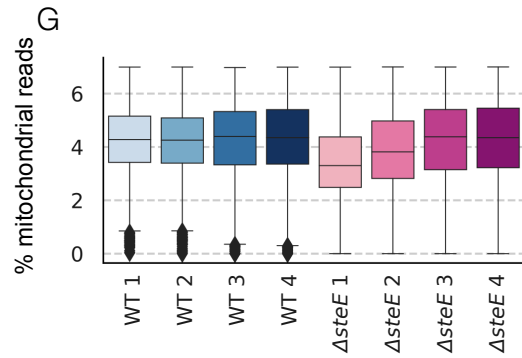

**Fig. S1.**

**Related to Figure 1 (A)** schematic outline of the droplet-based scRNA-seq of splenocytes from mice infected either with WT STm or  $\Delta steE$  STm. **(B-C)** FACS gating scheme for CD11b<sup>+</sup>CD11c<sup>+</sup>Ly6C<sup>+</sup>CD64<sup>+</sup>MHC<sup>hi</sup> granuloma macrophages, which also have high F4/80 expression. Samples were gated for size/scatter, singlet, living CD11b<sup>+</sup> population then further gated as displayed. Plots shown are results from WT-STm infected. For permissive FACS enrichment of CD11b<sup>+</sup>CD11c<sup>+</sup>Ly6C<sup>+</sup> granuloma macrophages, sorting gates were set tightly for size/scatter, singlet, and living cells but more loosely for CD11b, Ly6G, Ly6C, and CD11c markers. This enrichment strategy enables significant enrichment of granuloma-associated macrophages while simultaneously capturing the full spectrum of immune cells in the infected spleens. Red arrow indicates the CD11b<sup>+</sup>CD11c<sup>+</sup>Ly6C<sup>+</sup> mononuclear phagocyte (MNP) population targeted for enrichment for scRNA-seq library preparation. **(D)** Number of analyzed cells that passed the quality controls from individual mice. Cells that had < 1000 unique molecular identifier (UMI) counts, < 500 detected genes, and > 5% reads with mitochondrial origin (indicate stressed or dying cells) were filtered. A total of 22,512 cells from WT and  $\Delta steE$ -STm infected mice passed quality controls. **(E)** Distribution of UMI counts in analyzed cells. **(F)** Distribution of the number of detected genes in analyzed cells. **(G)** Distribution of the percent reads that are mapped to mitochondrial genes in analyzed cells.

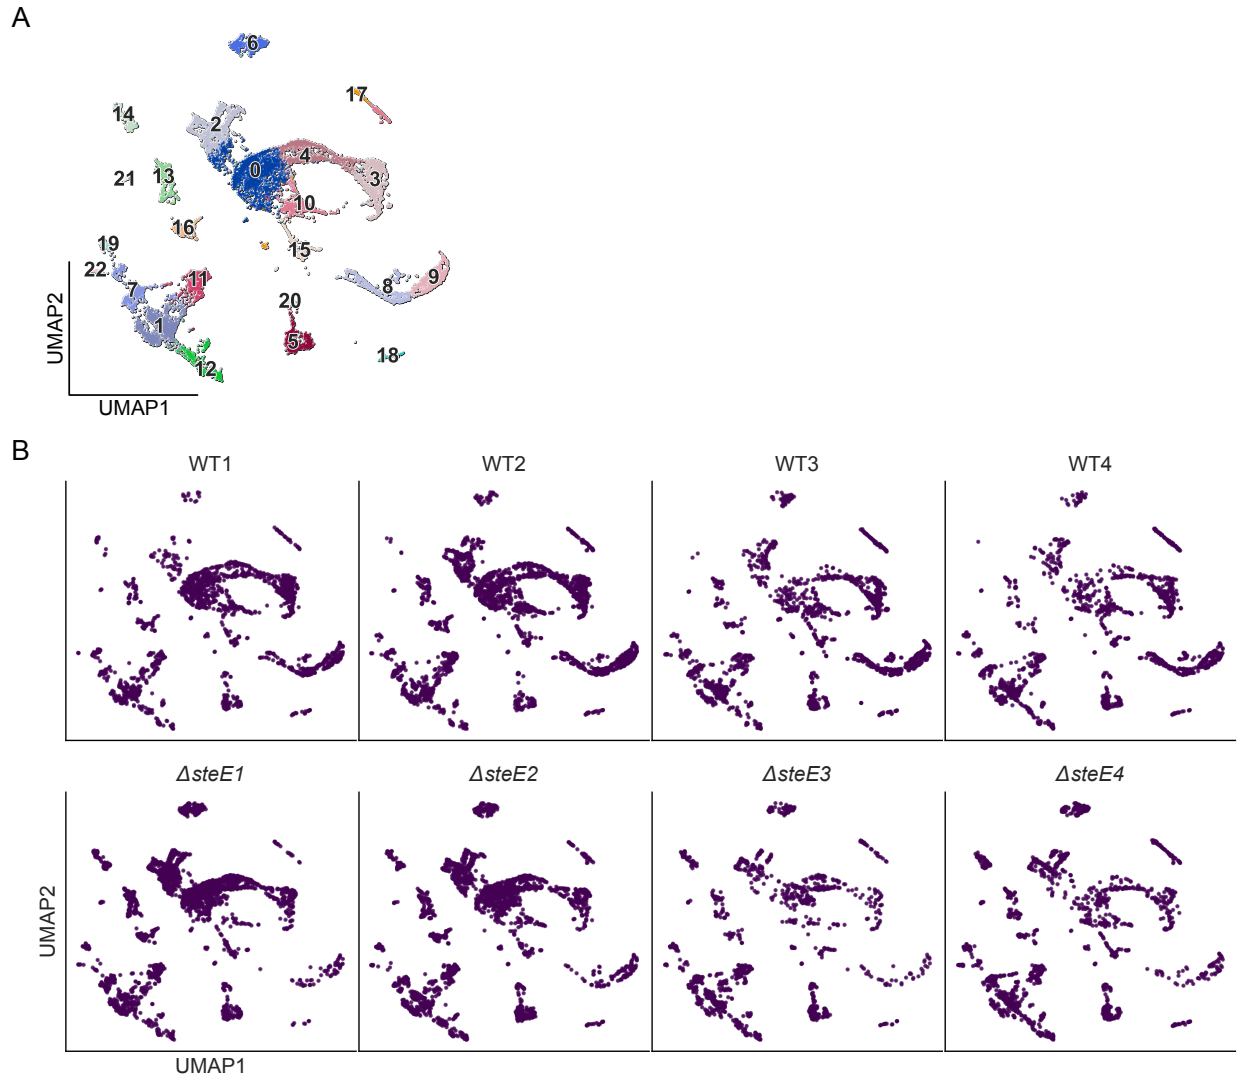

**Fig. S2.**

**Related to Figure 1. (A)** UMAP projection colored by Leiden clusters. **(B)** UMAP projections of cells from either WT STm or  $\Delta steE$  STm-infected mice. Cells are well mixed in each part of the manifold, indicating a lack of technical batch effect.

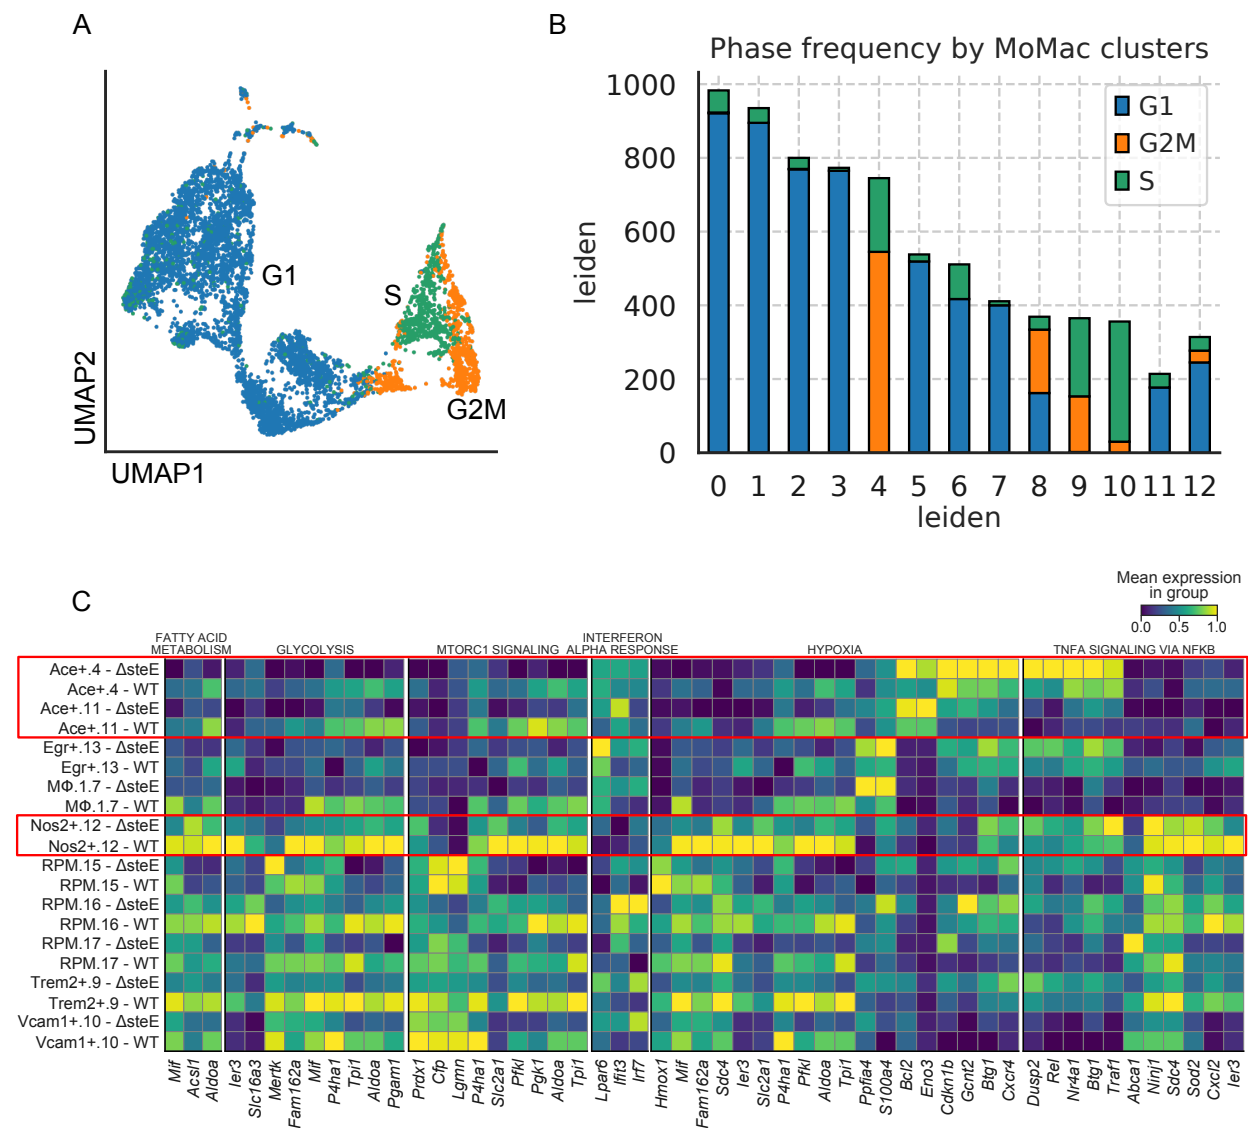

**Fig. S3.**

**Related to Figure 3. (A)** UMAP projection of myeloid populations colored by predicted cell cycle states. **(B)** Cell cycle phase frequency for each MNP cluster. **(C)** Heatmap of standardized expression of genes in selected pathways in Figure 3H.

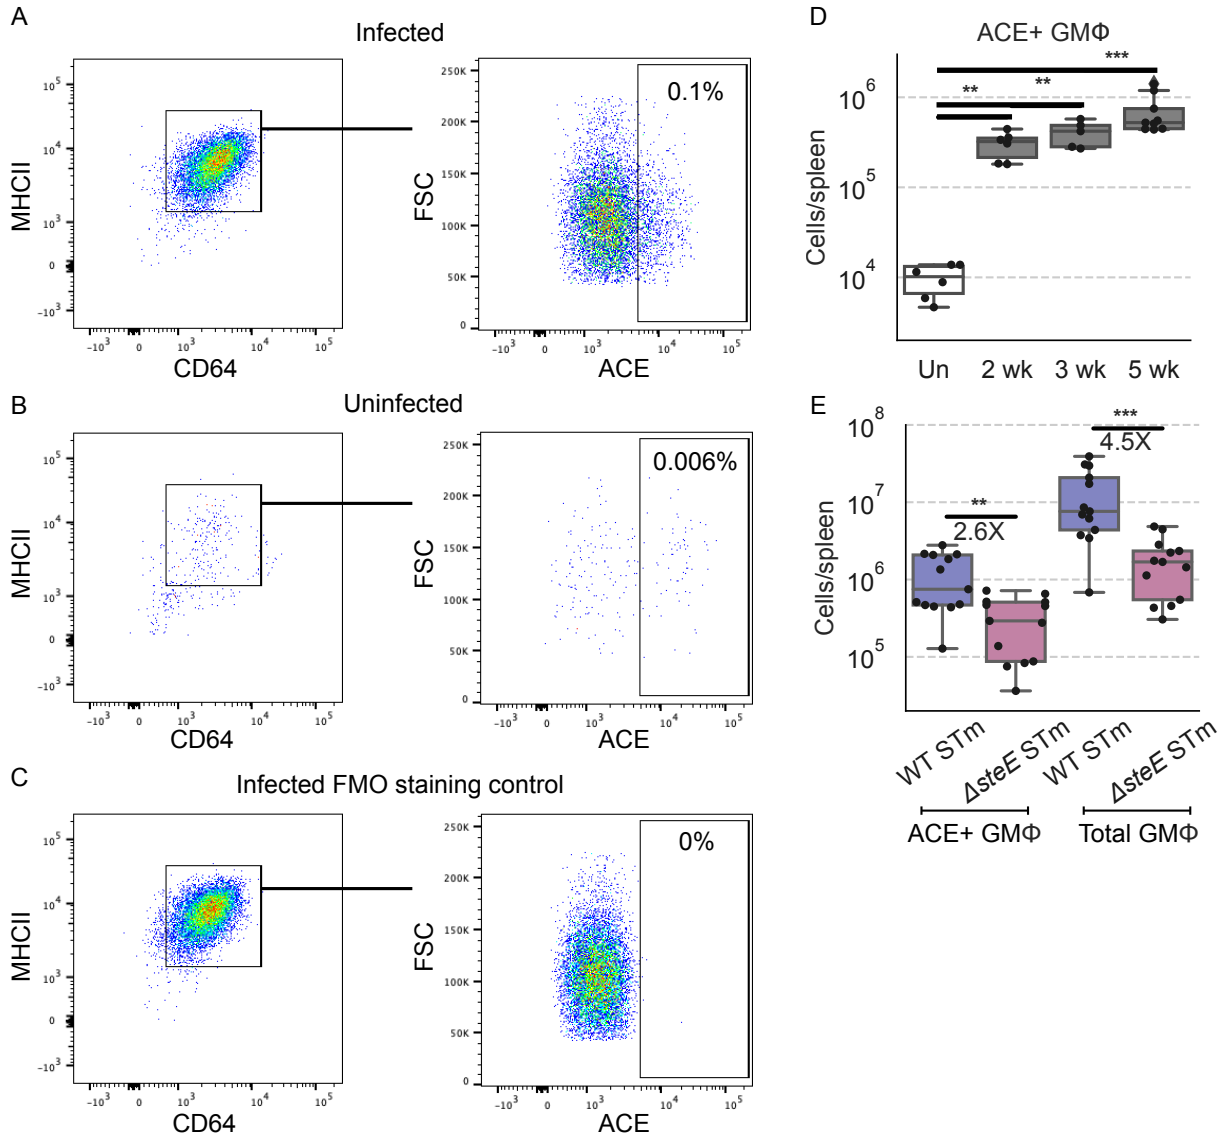

**Fig. S4.**

**Related to Figure 4.** Mice were infected intraperitoneally with  $2 \times 10^3$  CFU WT-STm and analyzed at 1 month post-inoculation. Flow cytometry gating for ACE<sup>+</sup> granuloma macrophages. Splenocytes were gated for singlet, living CD11b<sup>+</sup>CD11c<sup>+</sup>Ly6C<sup>+</sup> population, then gated as displayed. Percentages indicate frequencies of gated cells among total splenocytes. Plots shown are results from infected mice (**A**), uninfected mice (**B**), or infected mice but without ACE antibody stain as a control (**C**). (**D**) The number of ACE<sup>+</sup> granuloma macrophages (GMΦ) isolated from the spleens of uninfected mice or mice that had been infected with WT STm for 2, 3, or 5 weeks. At least 6 mice were included in each group. Dots: individual mice. (**E**) The number of

ACE<sup>+</sup> GMΦ or total GMΦ isolated from the spleen of mice that had been inoculated with WT or  $\Delta steE$  STm for 1-month. Thirteen mice were included in each group. Dots: individual mice. Numbers below the significance bar indicate the fold-change between WT STm and  $\Delta steE$  STm infection groups. **(D-E)** Significance calculated using a two-tailed Mann-Whitney test. \*\*  $p < 0.01$ , \*\*\*  $p < 0.001$ .

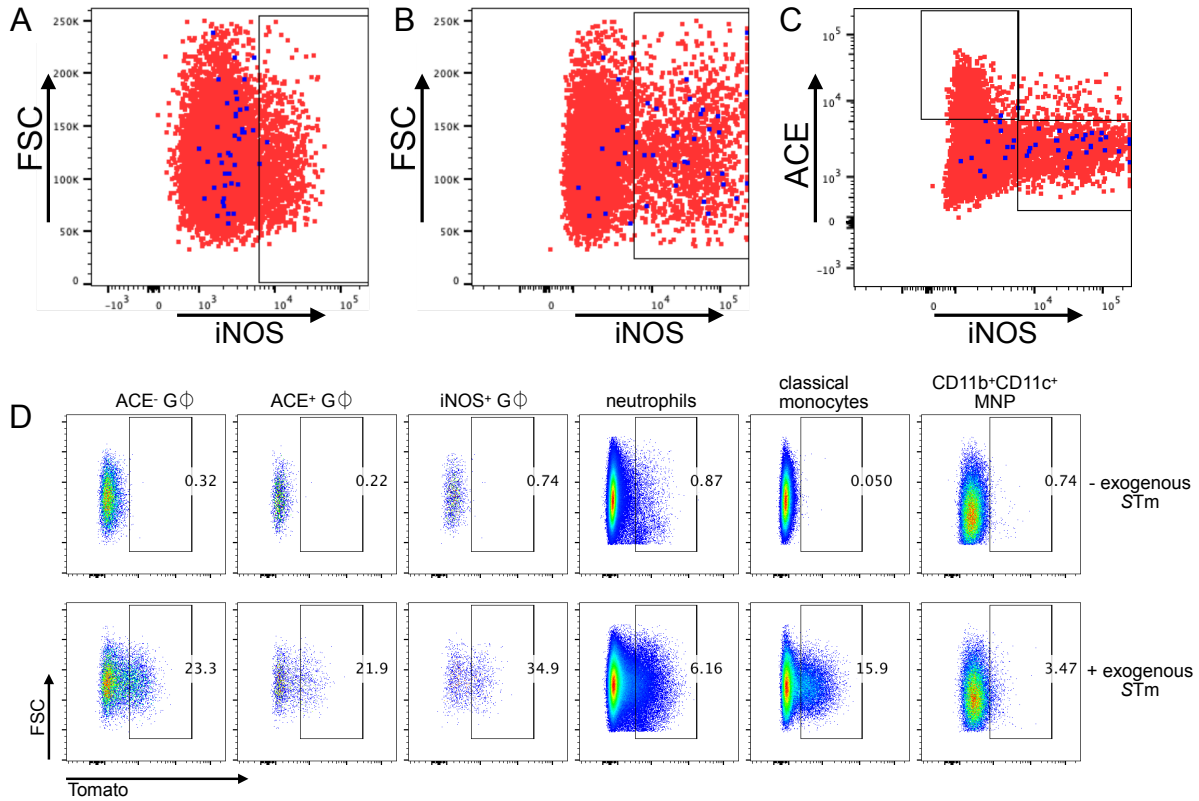

**Fig. S5.**

**Related to Figure 5. (A-C)** Mice were infected *intraperitoneally* (*i.p.*) with  $2 \times 10^3$  CFU WT-STm and analyzed at 1 month post-inoculation. Flow cytometry showing STm-containing cells among iNOS<sup>+</sup> and ACE<sup>+</sup> granuloma macrophages. CD11b<sup>+</sup>CD11c<sup>+</sup>Ly6C<sup>+</sup>CD64<sup>+</sup>MHC<sup>hi</sup> granuloma macrophages were gated as in Figure S1B, then plotted for FSC, iNOS, or ACE as shown. Red events: all granuloma macrophages, blue events: granuloma macrophages harboring intracellular STm. **(D)** *Ex vivo* measurements of STm entry into splenocytes from mice that had been infected for 1-month. Gated frequencies indicate entry of Tomato<sup>+</sup> STm added exogenously *ex vivo* into different cell populations by FACS analysis. Abbreviations: granuloma macrophage, G $\phi$ ; CD11b<sup>+</sup>CD11c<sup>+</sup> mononuclear phagocyte, CD11b<sup>+</sup> CD11c<sup>+</sup> MNP.



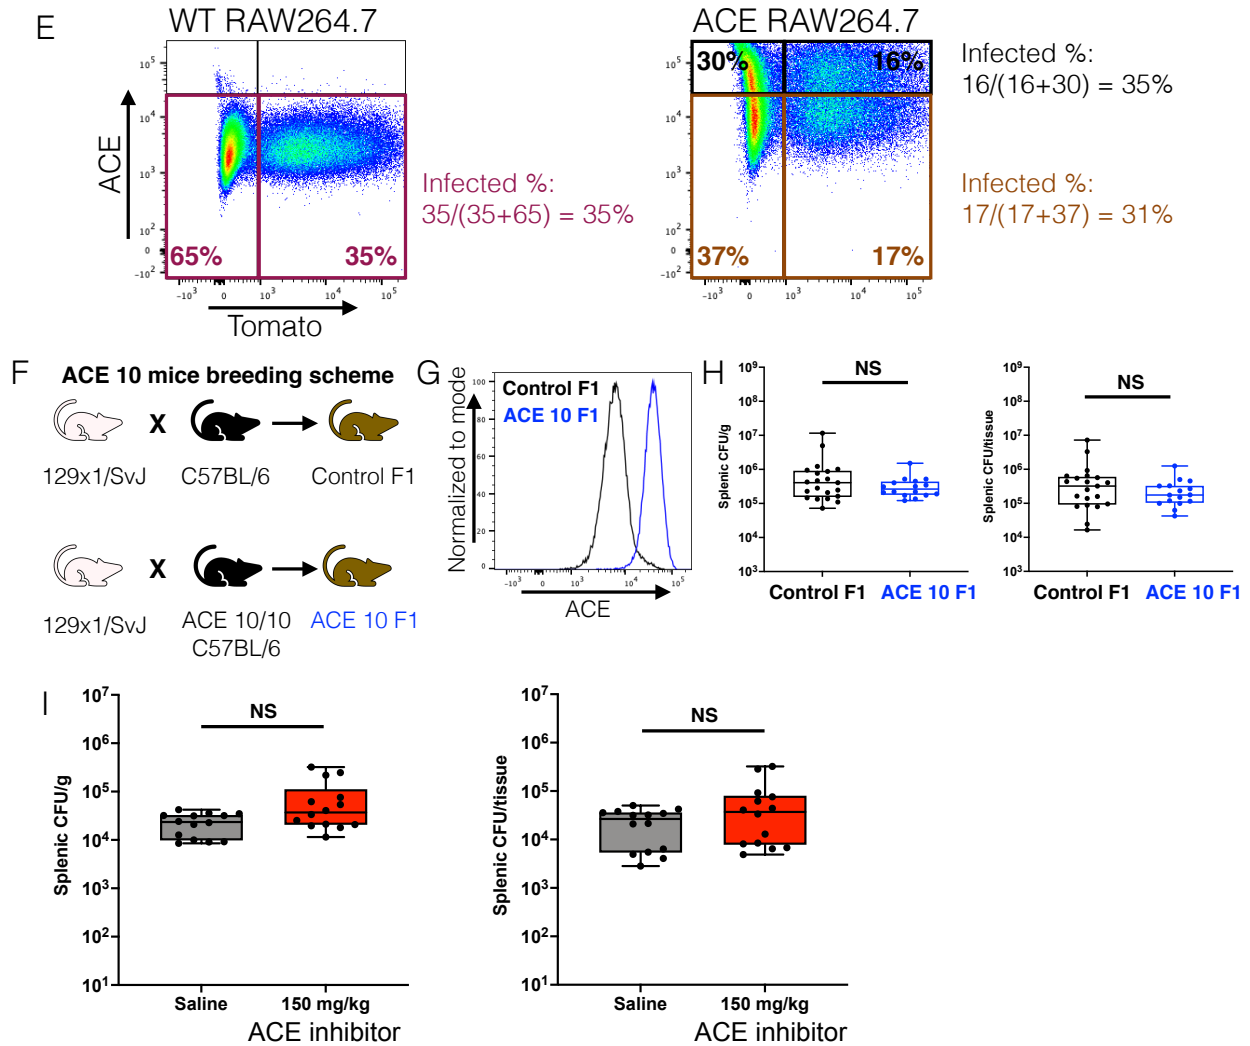

**Fig. S5 continued.**

**Related to Figure 5. (E)** *Ace* was expressed in RAW264.7 macrophages using lentiviral transduction. WT and ACE-overexpressing RAW264.7 macrophages were infected with STm and analyzed by flow cytometry 20 hours later. The percent frequencies of STm<sup>+</sup> cells were similar between ACE<sup>-</sup> and ACE<sup>+</sup> cells. **(F)** Breeding scheme to generate [ACE 10/10 x 129x1/SvJ] F1 mice and [C57BL/6 x 129x1/SvJ] F1 control mice for infection. **(G-H)** Mice were infected with 1-2 x 10<sup>3</sup> CFU WT-STm *i.p.* and analyzed at two weeks post-inoculation. **(G)** Flow cytometry analysis shows splenic CD11b<sup>+</sup>CD11c<sup>+</sup>Ly6C<sup>+</sup>CD64<sup>+</sup>MHC<sup>hi</sup> granuloma macrophages from infected ACE 10 heterozygous F1 mice expressing significantly higher ACE levels compared to

granuloma macrophages from control F1 mice. **(H)** CFU measurements show similar STm bacterial levels in the spleens of ACE 10 heterozygous F1 mice and control mice. **(I)** Inhibition of ACE enzymatic activity *in vivo* had no significant impact on STm levels in infected spleens. Mice were infected for 1 month then treated with either saline control or 150 mg/kg of the ACE inhibitor captopril *i.p.* daily for 7 days before analysis. **(H-I)**. Dots: individual mice. Significance calculated using a two-tailed Mann-Whitney test. NS  $p > 0.05$ .

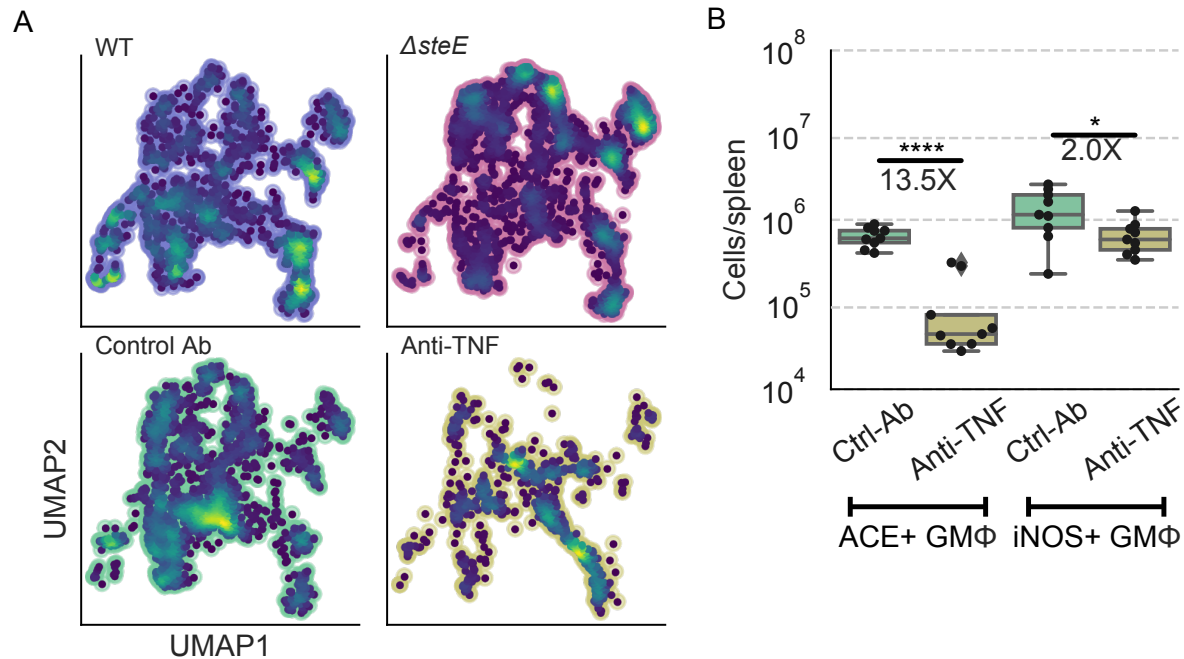

**Fig. S6.**

**Related to Figure 6. (A)** UMAP projections of mononuclear phagocytes, excluding dendritic cells, isolated from WT STm,  $\Delta steE$  STm-infected mice, or WT STm-infected mice treated with isotype control or anti-TNF. Color reflects cell density in each part of the manifold. **(B)** The number of ACE<sup>+</sup> and iNOS<sup>+</sup> GMΦ cells isolated from the spleen of mice that had been inoculated with WT STm for 1-month and treated with isotype control (Ctrl-Ab) or anti-TNF antibody (Anti-TNF). Nine mice were included in each group. Numbers below the significance bar indicate the fold-change between Ctrl-Ab treated and Anti-TNF treated groups. **(B)**. Dots: individual mice. Significance calculated using a two-tailed Mann-Whitney test. \*  $p < 0.05$ , \*\*\*\*  $p < 0.0001$ .

Table S1: List of antibodies used in this study

| <b>Antibody</b>                      | <b>SOURCE</b> | <b>IDENTIFIER</b>                   |
|--------------------------------------|---------------|-------------------------------------|
| Anti- <i>Salmonella</i> CSA-1        | KPL           | Cat# 02-91-99                       |
| CD106 (VCAM-1) biotin                | Biolegend     | Cat# 105704<br>RRID:AB_313205       |
| CD106 (VCAM-1) biotin                | Biolegend     | Cat# 105704<br>RRID:AB_313205       |
| CD106 (VCAM-1) PE-Cy7                | Biolegend     | Cat# 105720<br>RRID:AB_2214046      |
| CD11b Alexa Fluor 647                | Biolegend     | Cat# 101218<br>RRID:AB_389327       |
| CD11b Brilliant Violet 785           | Biolegend     | Cat# 101243<br>RRID:AB_2561373      |
| CD11c Alexa Fluor 700                | eBioscience   | Cat# 56-0114-80<br>RRID:AB_493993   |
| CD11c FITC                           | eBioscience   | Cat# 11-0114-82<br>RRID:AB_464940   |
| CD11c PE-Cy7                         | BD Pharmingen | Cat# 558079<br>RRID:AB_647251       |
| CD115 Brilliant Violet 605™          | Biolegend     | Cat# 135517<br>RRID:AB_2562760      |
| CD143/ACE unconjugated goat antibody | R&D Systems   | Cat# AF1513<br>RRID:AB_354832       |
| CD19 APC eFluor 780                  | eBioscience   | Cat# 47-0193-82<br>RRID:AB_10853189 |

|                                      |                |                                     |
|--------------------------------------|----------------|-------------------------------------|
| CD19 BUV 395                         | BD Biosciences | Cat# 563557<br>RRID:AB_2722495      |
| CD3e APC eFluor 780                  | eBioscience    | Cat# 47-0031-82<br>RRID:AB_11149861 |
| CD301 Alexa Fluor 647                | Bio-Rad        | Cat# MCA2392A647<br>RRID:AB_872012  |
| CD301 PE                             | Biolegend      | Cat# 145704<br>RRID:AB_2561961      |
| CD45.1 APC                           | Biolegend      | Cat# 110713<br>RRID:AB_313502       |
| CD45.2 PerCP Cy5.5                   | eBioscience    | Cat# 45-0454-80<br>RRID:AB_953592   |
| CD49b APC eFluor 780                 | eBioscience    | Cat# 47-5971-82<br>RRID:AB_11218895 |
| CD64 PE                              | Biolegend      | Cat# 139304<br>RRID:AB_10612740     |
| CD64 Brilliant Violet 605™           | Biolegend      | Cat# 139323<br>RRID:AB_2629778      |
| CD86 Brilliant Violet 510™           | Biolegend      | Cat# 105040<br>RRID:AB_2315766      |
| Donkey anti-goat IgG Alexa Fluor 488 | ThermoFisher   | Cat# A11055<br>RRID:AB_2534102      |
| Donkey anti-goat IgG Alexa Fluor 647 | ThermoFisher   | Cat# A21447<br>RRID:AB_2535864      |
| F4/80 PE                             | eBioscience    | Cat# 12-4801-82<br>RRID:AB_465923   |

|                              |                |                                    |
|------------------------------|----------------|------------------------------------|
| F4/80 Brilliant Violet 650™  | Biolegend      | Cat# 123149<br>RRID:AB_2564589     |
| IL-4Ra PE-Cy7                | Biolegend      | Cat# 144806<br>RRID:AB_2565599     |
| IL-4Ra BV421                 | BD Biosciences | Cat# 564086<br>RRID:AB_2738584     |
| iNOS Alexa Fluor 488         | eBioscience    | Cat# 53-5920-82<br>RRID:AB_2574423 |
| iNOS APC                     | eBioscience    | Cat# 17-5920-80<br>RRID:AB_2573243 |
| iNOS e450                    | eBioscience    | Cat# 48-5920-82<br>RRID:AB_2802293 |
| Ly-6C APC                    | eBioscience    | Cat# 17-5932-82<br>RRID:AB_1724153 |
| Ly-6C PerCP/Cy5.5            | eBioscience    | Cat# 45-5932-82<br>RRID:AB_2723343 |
| Ly-6G FITC                   | BD Biosciences | Cat# 551460<br>RRID:AB_394207      |
| Ly-6G BUV395                 | BD Biosciences | Cat# 563978<br>RRID:AB_2716852     |
| MerTK APC eFluor 780         | eBioscience    | Cat# 47-5751-82<br>RRID:AB_2848373 |
| MHC class II APC eFluor 780  | eBioscience    | Cat# 47-5321-80<br>RRID:AB_1548792 |
| MHC class II Alexa Fluor 700 | eBioscience    | Cat# 56-5321-82<br>RRID:AB_494009  |

|                                          |           |                                |
|------------------------------------------|-----------|--------------------------------|
| Ultra-LEAF™ Purified Rat IgG1, κ Isotype | Biologend | Cat# 400458                    |
| Ultra-LEAF™ Purified anti-mouse TNF      | Biologend | Cat# 506348<br>RRID:AB_2616672 |
